# Supplementary material for: Comparative Transcriptomics Reveals Gene Families Associated with Predatory Behavior in Photuris femme fatale Fireflies
Source: Genes (Basel). 2020 Jun 7;11(6):627. doi: 10.3390/genes11060627 (PMC7348864; doi:10.3390/genes11060627)
Supplement: Supplementary file 1 [file genes-11-00627-s001.pdf]

## Supplemental Text 1: *Pn. pyralis* head tissue analysis:

### Materials and Methods:

To investigate the effect of using multiple individuals for the *Photinus pyralis* assembly on our results, we repeated the assembly and analyses using RNAseq data from a single *Pn. pyralis* male head (SRR2103848, Sander and Hall 2015).

### Results and Discussion:

2.8 Gb of sequence data were used to assemble the *Pn. pyralis* transcriptome. The resulting assembly has a similar number of transcripts to the *Photuris* head-only transcriptome assemblies (Supplemental Table 7 and Table 1). The BUSCO score is also slightly higher than the previous assembly (Supplemental Table 9 and Table 2).

#### *Species comparisons identify gene families under selection*

The FUSTr analysis found 12 total gene families with evidence for positive selection in the control comparisons (Supplemental Table 10). All of these gene families were found in the original analysis. We note the similarities and the differences between the original and new analysis for each comparison below:

#### *Similarities and differences in the Photinus pyralis (head tissue) and Photuris frontalis (non-predatory) comparison.*

In this new *Pn. pyralis* and *Pt. frontalis* comparison, we identified three of the same gene families found in the previous analysis: kielin/chordin like protein and two zinc finger protein homologs (Supplemental Table 11 and Figure 2). All other gene families in the original analysis were not found in these results (4-coumarate--CoA ligase 1-like, antichymotrypsin-2, ubiquinone biosynthesis O-methyltransferase, uncharacterized protein, and a family with no BLAST hits; Supplemental Table 11 and Figure 2).

Two gene families that were found in other comparisons in the original results were found as positively selected (Supplemental Table 11 and Figure 2). Farnesol dehydrogenase was originally found in the *Pt. sp.* (predatory) and *Pt. frontalis* (non-predatory) comparison. Farnesol dehydrogenase is involved in juvenile hormone (JH) production (Mayoral et al. 2009). We hypothesize that the function of the JH may be relevant to predatory behavior due to its ability to be a gonadotropin. Because this analysis is composed of only non-predatory species, it is possible that farnesol dehydrogenase is not involved in predatory behavior. Additionally, we identified UDP-glucuronosyltransferase as positively selected in this comparison, however, it was originally found in only the *Pt. sp.* (predatory) and *Pn. pyralis* (control) comparison. UDP-glucuronosyltransferase can facilitate detoxification, and it was for this reason that we thought it could be involved in predatory behavior (Meech and Mackenzie 1997). However, it also functions in olfaction, cuticle formation, and pigmentation (Lazard et al. 1991, Hopkins and Kramer 1992, and Wiesen et al. 1994). These functions are more likely due to the non-predatory nature of this comparison.

#### *Similarities and differences in the Photinus pyralis (head tissue) and Photuris sp. (predatory) comparison.*

In this new *Pn. pyralis* and *Pt. sp.* comparison, we identified five of the same gene families found in the previous analysis: UDP-glucuronosyltransferase, spermine oxidase, uncharacterized protein, and two zinc finger protein homologs (Supplemental Table 12 and Figure 2). All other gene families in the original analysis were not found in these results (facilitated trehalose transporter Tret1-like, glucose dehydrogenase, juvenile hormone acid O-methyltransferase, odorant binding protein, takeout protein, and ubiquinone biosynthesis O-methyltransferase).

Two gene families that were originally found in other comparisons in the original results were found as positively selected (Supplemental Table 12 and Figure 2). Farnesol dehydrogenase was also found in this comparison, therefore it was found in all comparisons. This shows that it may not be involved in predatory behavior. Antichymotrypsin was originally found in the *Pn. pyralis* and *Pt. frontalis* comparison. Now, it is found in the *Pn. pyralis* (head tissue) and *Pt. sp.* comparison, and not in the *Pn. pyralis* (head tissue) and *Pt. frontalis* comparison. Antichymotrypsin is a member of the serpin family, which have been found to be involved in innate immunity

(Meekins et al. 2017). Because antichymotrypsin was originally found in the non-predatory vs. control comparison, we would expect it to not be involved in predatory behavior.

*Gene families not identified in the new analysis.*

There was a total of 11 gene families not found in the new analysis across comparisons (Supplemental Tables 11-12, Figure 2). This is likely due to the smaller number of tissues, thus, and thus, lower number of transcripts in the new *Pn. pyralis* transcriptome assembly.

**Supplemental Table 1: Raw read data:** SRA Number = Short read archive number for sample. Tissue = tissue the sample was extracted from. Accession = NCBI accession number. Length = read length. N Spots = number of spots. N Bases = number of basepairs.

| Species                 | SRA Number | Tissue                                               | Accession   | Length (bp) | N Spots  | N Bases (G) |
|-------------------------|------------|------------------------------------------------------|-------------|-------------|----------|-------------|
| <i>Photinus pyralis</i> | SRR2103848 | male head                                            | PRJNA289908 | 100         | 14246268 | 2.8         |
| <i>Photinus pyralis</i> | SRR2103849 | male light organ                                     | PRJNA289908 | 100         | 11816288 | 2.4         |
| <i>Photinus pyralis</i> | SRR2103867 | larval light organ                                   | PRJNA289908 | 100         | 13007015 | 2.6         |
| <i>Photinus pyralis</i> | SRR3521424 | posterior abdomen                                    | PRJNA321737 | 126         | 20140685 | 4.2         |
| <i>Photinus pyralis</i> | SRR3883756 | FatBody                                              | PRJNA328865 | 100         | 11045965 | 2.2         |
| <i>Photinus pyralis</i> | SRR3883757 | FatBody                                              | PRJNA328865 | 100         | 8696048  | 1.7         |
| <i>Photinus pyralis</i> | SRR3883758 | Male other reproductive accessory glands             | PRJNA328865 | 100         | 11037319 | 2.2         |
| <i>Photinus pyralis</i> | SRR3883759 | Male other reproductive accessory glands post mating | PRJNA328865 | 100         | 7455988  | 1.5         |
| <i>Photinus pyralis</i> | SRR3883760 | Female spermatophore digesting glands and Bursa      | PRJNA328865 | 100         | 9439392  | 1.9         |
| <i>Photinus pyralis</i> | SRR3883761 | Male reproductive spiral glands post mating          | PRJNA328865 | 100         | 9223507  | 1.8         |
| <i>Photinus pyralis</i> | SRR3883762 | Female spermatheca                                   | PRJNA328865 | 100         | 12232743 | 2.4         |
| <i>Photinus pyralis</i> | SRR3883763 | Male reproductive spiral gland                       | PRJNA328865 | 100         | 14616067 | 2.9         |
| <i>Photinus pyralis</i> | SRR3883764 | Male reproductive spiral gland                       | PRJNA328865 | 100         | 7932593  | 1.6         |
| <i>Photinus</i>         | SRR388     | Male reproductive spiral gland                       | PRJNA3      | 100         | 6457676  | 1.3         |

|                           |                |                                                 |                 |     |          |      |
|---------------------------|----------------|-------------------------------------------------|-----------------|-----|----------|------|
| <i>pyralis</i>            | 3765           |                                                 | 28865           |     |          |      |
| <i>Photinus pyralis</i>   | SRR388<br>3766 | FatBody                                         | PRJNA3<br>28865 | 100 | 9025721  | 1.8  |
| <i>Photinus pyralis</i>   | SRR388<br>3767 | FatBody post mating                             | PRJNA3<br>28865 | 100 | 12981252 | 2.6  |
| <i>Photinus pyralis</i>   | SRR388<br>3768 | Female thorax                                   | PRJNA3<br>28865 | 100 | 8574669  | 1.7  |
| <i>Photinus pyralis</i>   | SRR388<br>3769 | Male throat                                     | PRJNA3<br>28865 | 100 | 11164875 | 1.2  |
| <i>Photinus pyralis</i>   | SRR388<br>3770 | Male throat                                     | PRJNA3<br>28865 | 100 | 7176451  | 1.4  |
| <i>Photinus pyralis</i>   | SRR388<br>3771 | Male throat                                     | PRJNA3<br>28865 | 100 | 7400466  | 1.5  |
| <i>Photinus pyralis</i>   | SRR388<br>3772 | Male other reproductive accessory glands        | PRJNA3<br>28865 | 100 | 8461346  | 1.7  |
| <i>Photinus pyralis</i>   | SRR388<br>3773 | Male other reproductive accessory glands        | PRJNA3<br>28865 | 100 | 10194748 | 2    |
| <i>Photinus pyralis</i>   | SRR634<br>5445 | larvae                                          | PRJNA3<br>78805 | 150 | 31282614 | 9.4  |
| <i>Photinus pyralis</i>   | SRR634<br>5446 | adult male dissected photophore                 | PRJNA3<br>78805 | 100 | 15475496 | 3.1  |
| <i>Photinus pyralis</i>   | SRR634<br>5447 | eggs                                            | PRJNA3<br>78805 | 150 | 44551762 | 13.4 |
| <i>Photinus pyralis</i>   | SRR634<br>5449 | adult female whole body                         | PRJNA3<br>78805 | 150 | 31480011 | 9.4  |
| <i>Photinus pyralis</i>   | SRR634<br>5452 | adult male whole body                           | PRJNA3<br>78805 | 150 | 31194573 | 9.4  |
| <i>Photinus pyralis</i>   | SRR634<br>5453 | adult male dissected photophore                 | PRJNA3<br>78805 | 100 | 9281220  | 1.9  |
| <i>Photinus pyralis</i>   | SRR634<br>5454 | adult male dissected photophore                 | PRJNA3<br>78805 | 100 | 9058347  | 1.8  |
| <i>Photinus pyralis</i>   | SRR734<br>5580 | 3 pooled 4th instar larvae dissected photophore | PRJNA3<br>78805 | 100 | 43423999 | 8.7  |
| <i>Photuris frontalis</i> | SRR210<br>4391 | male head                                       | PRJNA2<br>89908 | 100 | 11373006 | 2.3  |
| <i>Photuris sp.</i>       | SRR210<br>4392 | male head                                       | PRJNA2<br>89908 | 100 | 12359044 | 2.5  |

**Supplemental Table 2: Trinity assembly statistics based on all transcript contigs.**

| <b>Species</b>            | <b>Median contig length</b> | <b>Average contig length</b> | <b>Total assembled bases</b> | <b>N50</b> |
|---------------------------|-----------------------------|------------------------------|------------------------------|------------|
| <i>Photinus pyralis</i>   | 404                         | 932.84                       | 175816477                    | 2030       |
| <i>Photuris sp.</i>       | 591                         | 1295.24                      | 73344107                     | 2602       |
| <i>Photuris frontalis</i> | 554                         | 1197                         | 69459423                     | 2353       |

**Supplemental Table 3: Previously published assembly BUSCO scores.** (Sander and Hall 2015; Fallon et al. 2018)

| Species                   | Complete BUSCOs | Complete and single -copy BUSCOs | Complete and duplicated BUSCOs | Fragmented BUSCOs | Missing BUSCOs | Total BUSCO groups searched |
|---------------------------|-----------------|----------------------------------|--------------------------------|-------------------|----------------|-----------------------------|
| <i>Photuris frontalis</i> | 88.0%           | 65.8%                            | 22.2%                          | 6.4%              | 5.6%           | 2442                        |
| <i>Photuris sp.</i>       | 88.8%           | 67.2%                            | 21.6%                          | 5.9%              | 5.3%           | 2442                        |
| <i>Photinus pyralis</i>   | 95.2%           | 60.4%                            | 34.8%                          | 2.5%              | 2.3%           | 2442                        |

**Supplemental Table 4. Homologs of genes under positive selection in *Photuris sp.* vs. *Photuris frontalis* comparison identified by BLAST.** Gene family = arbitrarily assigned gene family number from FUSTr. N genes = number of genes in the gene family. N sites under selection = amino acid sites under positive selection in the consensus sequence. N BLAST hits = number of significant (evalue cutoff of  $1e^{-5}$ ) BLAST hits within that gene family. N genes with BLAST hits = number of genes in the gene family that had BLAST hits. N genes *Photuris sp.* = number of genes in the family that are from *Photuris sp.* N genes *Photuris frontalis* - number of genes in the family that are from *Photuris frontalis*. BLAST homolog = the homolog that a majority of the gene family had a BLAST hit for.

| Gene family | N genes | N sites under positive selection | N BLAST hits | N genes with BLAST hits | N genes <i>Pt. sp.</i> | N genes <i>Pt. frontalis</i> | BLAST homolog                                 |
|-------------|---------|----------------------------------|--------------|-------------------------|------------------------|------------------------------|-----------------------------------------------|
| 553         | 18      | 1                                | 737          | 18                      | 7                      | 11                           | Retinol dehydrogenase                         |
| 987         | 15      | 1                                | 448          | 15                      | 8                      | 7                            | Cystinosin homolog                            |
| 470         | 38      | 1                                | 912          | 38                      | 20                     | 18                           | Glutathione S-transferase                     |
| 2079        | 40      | 3                                | 1248         | 40                      | 21                     | 19                           | Farnesol dehydrogenase                        |
| 964         | 24      | 3                                | 800          | 24                      | 13                     | 11                           | Serine protease                               |
| 381         | 20      | 1                                | 1075         | 20                      | 9                      | 11                           | Transmembrane protease serine                 |
| 86          | 19      | 3                                | 260          | 19                      | 7                      | 12                           | Longitudinals lacking protein ( <i>lola</i> ) |

|       |     |   |      |     |     |     |                         |
|-------|-----|---|------|-----|-----|-----|-------------------------|
| 306   | 156 | 4 | 319  | 26  | 68  | 88  | Zinc finger protein     |
| 1478  | 26  | 1 | 362  | 26  | 11  | 15  | Uncharacterized protein |
| Total | 356 |   | 6161 | 226 | 164 | 192 |                         |

**Supplemental Table 5. Homologs of genes under positive selection in *Photuris frontalis* vs. *Photinus pyralis* comparison identified by BLAST.** Gene family = arbitrarily assigned gene family number from FUSTr. N genes = number of genes in the gene family. N sites under selection = amino acid sites under positive selection in the consensus sequence. N BLAST hits = number of significant (evalue cutoff of  $1e^{-5}$ ) BLAST hits within that gene family. N genes with BLAST hits = number of genes in the gene family that had BLAST hits. N genes *Photuris frontalis*. = number of genes in the family that are from *Photuris frontalis*. N genes *Photinus pyralis* - number of genes in the family that are from *Photinus pyralis*. BLAST homolog = the homolog that a majority of the gene family had a BLAST hit for.

| Gene family | N genes | N sites under positive selection | N BLAST hits | N genes with BLAST hits | N genes <i>Pt. frontalis</i> | N genes <i>Pn. pyralis</i> | BLAST homolog                                  |
|-------------|---------|----------------------------------|--------------|-------------------------|------------------------------|----------------------------|------------------------------------------------|
| 881         | 21      | 1                                | 106          | 13                      | 16                           | 5                          | Kielin/chordin-like protein/protease inhibitor |
| 238         | 19      | 1                                | 504          | 19                      | 7                            | 12                         | Antichymotrypsin-2                             |
| 30          | 21      | 2                                | 840          | 22                      | 10                           | 11                         | 4-coumarate--CoA ligase 1-like                 |

|       |     |   |      |     |     |     |                                                            |
|-------|-----|---|------|-----|-----|-----|------------------------------------------------------------|
| 383   | 28  | 1 | 560  | 28  | 15  | 13  | Ubiquinone biosynthesis O-methyltransferase, mitochondrial |
| 261   | 69  | 2 | 229  | 16  | 69  | 0   | Zinc-finger protein                                        |
| 5627  | 121 | 2 | 194  | 14  | 0   | 121 | Zinc-finger protein                                        |
| 1255  | 38  | 1 | 2752 | 14  | 4   | 34  | Uncharacterized protein                                    |
| 218   | 20  | 1 | 0    | 0   | 3   | 17  | No BLAST hits                                              |
| Total | 337 |   | 5185 | 149 | 124 | 213 |                                                            |

**Supplemental Table 6. Homologs of genes under positive selection in *Photuris sp.* vs. *Photinus pyralis* comparison identified by BLAST.** Gene family = arbitrarily assigned gene family number from FUSTr. N genes = number of genes in the gene family. N sites under selection = amino acid sites under positive selection in the consensus sequence. N BLAST hits = number of significant (evalue cutoff of  $1e^{-5}$ ) BLAST hits within that gene family. N genes with BLAST hits = number of genes in the gene family that had BLAST hits. N genes *Photuris sp.* = number of genes in the family that are from *Photuris sp.* N genes *Photinus pyralis* - number of genes in the family that are from *Photinus pyralis*. BLAST homolog = the homolog that a majority of the gene family had a BLAST hit for.

| Gene family | N genes | N sites under positive selection | N BLAST hits | N genes with BLAST hits | N genes <i>Pt. sp.</i> | N genes <i>Pn. pyralis</i> | BLAST homolog |
|-------------|---------|----------------------------------|--------------|-------------------------|------------------------|----------------------------|---------------|
|-------------|---------|----------------------------------|--------------|-------------------------|------------------------|----------------------------|---------------|

|      |     |   |      |    |    |     |                                              |
|------|-----|---|------|----|----|-----|----------------------------------------------|
| 1810 | 17  | 1 | 865  | 17 | 6  | 11  | Spermine oxidase                             |
| 157  | 15  | 1 | 5    | 1  | 1  | 14  | Odorant binding protein                      |
| 517  | 25  | 1 | 343  | 25 | 6  | 19  | Juvenile hormone acid O-methyltransferase    |
| 365  | 35  | 1 | 2337 | 34 | 13 | 22  | Glucose dehydrogenase                        |
| 759  | 21  | 1 | 822  | 21 | 10 | 11  | Facilitated trehalose transporter Tret1-like |
| 347  | 52  | 2 | 2510 | 52 | 23 | 29  | UDP-glucuronosyltransferase                  |
| 1231 | 15  | 2 | 242  | 15 | 3  | 12  | Protein takeout                              |
| 686  | 25  | 1 | 503  | 25 | 12 | 13  | Ubiquinone biosynthesis O-methyltransferase  |
| 21   | 121 | 1 | 194  | 17 | 0  | 121 | Zinc finger protein                          |

|       |     |   |      |     |     |     |                         |
|-------|-----|---|------|-----|-----|-----|-------------------------|
| 5939  | 49  | 1 | 74   | 7   | 49  | 0   | Zinc finger protein     |
| 1017  | 20  | 1 | 1040 | 20  | 7   | 13  | Uncharacterized protein |
| 15    | 28  | 1 | 354  | 28  | 11  | 17  | Uncharacterized protein |
| Total | 423 |   | 8935 | 255 | 141 | 282 |                         |

**Supplemental Table 7. Assembly statistics for *Photinus pyralis* head tissue assembly based on all transcript contigs.** Statistics compiled from Trinity assembly assessment output (script name/flags). N genes = Number of unique genes in assembly, N transcripts = number of unique transcripts (including isoforms) in assembly. GC (%) = GC content percentage in assembly. Median length (bp) = median length. Mean length (bp) = mean length. N bases = Number of total bases in assembly. N50 = N50 statistic.

| Species                        | N genes | N transcripts | GC (%) | Median length (bp) | Mean length (bp) | N bases  | N50  |
|--------------------------------|---------|---------------|--------|--------------------|------------------|----------|------|
| <i>Photinus pyralis</i> (head) | 32017   | 49482         | 40.38  | 730                | 1473.50          | 72911734 | 2855 |

**Supplemental Table 8. Assembly statistics for *Photinus pyralis* head tissue assembly based on only the longest isoform per gene.** Median length (bp) = median length of longest isoforms per gene. Mean length (bp) = mean length of longest isoforms per gene. N bases = Number of total bases in assembly. N50 = N50 statistic.

| Species                        | Median length (bp) | Mean length (bp) | N bases  | N50  |
|--------------------------------|--------------------|------------------|----------|------|
| <i>Photinus pyralis</i> (head) | 427                | 1014.25          | 32473248 | 2094 |

**Supplemental Table 9. BUSCO assembly scores.** C = Complete BUSCOs. S = Complete and single-copy BUSCOs. D = Complete and duplicated BUSCOs. F = Fragmented BUSCOs. M = Missing BUSCOs.

| Species | C (%) | S (%) | D (%) | F (%) | M (%) |
|---------|-------|-------|-------|-------|-------|
|---------|-------|-------|-------|-------|-------|

|                                |       |       |       |      |      |
|--------------------------------|-------|-------|-------|------|------|
| <i>Photinus pyralis</i> (head) | 94.1% | 58.9% | 35.2% | 2.7% | 3.2% |
|--------------------------------|-------|-------|-------|------|------|

**Supplemental Table 10. FUSTr results.** Comparison = the two species FUSTr compared in its analysis. N input transcripts = number of transcripts input into FUSTr. N isoforms disregarded = number of isoforms removed from analysis. N transcripts used = number of transcripts used by FUSTr. N families = number of gene families found in each comparison. N families with > 15 sequences = number of gene families with greater than 15 sequences. N families with  $\beta > \alpha$  = number of gene families found to be under strong positive selection.

| Comparison                                  | N input transcripts | N Isoforms disregarded | N Transcripts used | N Families | N Families with > 15 sequences | N Families with $\beta > \alpha$ |
|---------------------------------------------|---------------------|------------------------|--------------------|------------|--------------------------------|----------------------------------|
| <i>Pt. frontalis</i> and <i>Pn. pyralis</i> | 107510              | 28364                  | 43471              | 34576      | 39                             | 5                                |
| <i>Pt. sp.</i> and <i>Pn. pyralis</i>       | 106108              | 29221                  | 41132              | 32256      | 37                             | 7                                |

**Supplemental Table 11. Homologs of genes under positive selection in *Photuris frontalis* and *Photinus pyralis* head tissue comparison identified by BLAST.** Gene family = arbitrarily assigned gene family number from FUSTr. N genes = number of genes in the gene family. N sites under selection = amino acid sites under positive selection in the consensus sequence. N BLAST hits = number of significant (evaluate cutoff of 1e-5) BLAST hits within that gene family. N genes with BLAST hits = number of genes in the gene family that had BLAST hits. BLAST homolog = the homolog that a majority of the gene family had a BLAST hit for.

| Gene Family | N Genes | N sites under selection | N BLAST hits | N Genes with BLAST hits | BLAST homolog               |
|-------------|---------|-------------------------|--------------|-------------------------|-----------------------------|
| 5955        | 76      | 2                       | 109          | 15                      | zinc finger protein         |
| 1820        | 40      | 1                       | 1236         | 38                      | Farnesol dehydrogenase      |
| 939         | 23      | 1                       | 99           | 12                      | kielin/chordin like protein |
| 280         | 48      | 1                       | 2314         | 47                      | UDP-glucuronosyltransferase |
| 266         | 68      | 2                       | 215          | 16                      | zinc finger protein         |
| Total       | 255     | 7                       | 3973         | 128                     |                             |

**Supplemental Table 12. Homologs of genes under positive selection in *Photuris* sp. and *Photinus pyralis* head tissue comparison identified by BLAST.** Gene family = arbitrarily assigned gene family number from FUSTr. N genes = number of genes in the gene family. N sites under selection = amino acid sites under positive selection in the consensus sequence. N BLAST hits = number of significant (evalue cutoff of 1e-5) BLAST hits within that gene family. N genes with BLAST hits = number of genes in the gene family that had BLAST hits. BLAST homolog = the homolog that a majority of the gene family had a BLAST hit for.

| Gene Family | N Genes | N sites under selection | N BLAST hits | N Genes with BLAST hits | BLAST homolog               |
|-------------|---------|-------------------------|--------------|-------------------------|-----------------------------|
| 19          | 43      | 1                       | 1348         | 43                      | farnesol dehydrogenase      |
| 183         | 76      | 3                       | 109          | 15                      | zinc finger protein         |
| 265         | 52      | 1                       | 2437         | 52                      | UDP-glucuronosyltransferase |
| 297         | 37      | 1                       | 1093         | 36                      | antichymotrypsin            |
| 702         | 17      | 1                       | 855          | 17                      | spermine oxidase            |
| 2855        | 15      | 1                       | 536          | 15                      | uncharacterized protein     |
| 5863        | 49      | 1                       | 74           | 7                       | zinc finger protein         |
| Total       | 289     | 9                       | 6452         | 185                     |                             |
